1        **Clinical Data on Hospital Environmental Hygiene Monitoring and**  
2                **Medical Staff Protection during the Coronavirus Disease 2019**  
3                                **Outbreak**

4  
5        **Yanfang Jiang<sup>1\*</sup>, Haifeng Wang<sup>1\*</sup>, Yukun Chen<sup>2</sup>, Jiaxue He<sup>1</sup>, Ligu Chen<sup>1</sup>, Yong**  
6        **Liu<sup>1</sup>, Xinyuan Hu<sup>1</sup>, Ang Li<sup>1</sup>, Siwen Liu<sup>1</sup>, Peng Zhang<sup>1</sup>, Hongyan Zou<sup>1</sup>, Shucheng**  
7        **Hua<sup>1,3#</sup>**

8        1. Key Laboratory of Organ Regeneration & Transplantation of the Ministry of  
9        Education, Genetic Diagnosis Center, The First Hospital of Jilin University, Changchun,  
10       China

11       2. Hospital-Acquired Infection Control Department, The First Hospital of Jilin  
12       University, Changchun, China

13       3. Department of Respiratory Medicine, The First Hospital of Jilin University, Jilin  
14       University, Changchun, Jilin, China

15  
16       # Corresponding Author: Shucheng Hua,

17       Department of Respiratory Medicine, The First Hospital of Jilin University, Jilin  
18       University, Changchun, Jilin, China

19       E-mail address: [huashucheng2020@163.com](mailto:huashucheng2020@163.com)

20       \* Yanfang Jiang and Haifeng Wang made equal contributions to this study.

21

22

23       **NOTE: This preprint reports new research that has not been certified by peer review and should not be used to guide clinical practice.**

24 Yanfang Jiang yanfangjiang@hotmail.com  
25 Haifeng Wang wanghaifeng1994@163.com  
26 Yukun Chen cyk0503@qq.com  
27 Jiaxue He jiaxue-he@163.com  
28 Ligu Chen 123043714@qq.com  
29 Yong Liu 530440980@qq.com  
30 Xinyuan Hu 1586878478@qq.com  
31 Ang Li li987001500@qq.com  
32 Siwen Liu 530229652@qq.com  
33 Peng Zhang [123126672@qq.com](mailto:123126672@qq.com)  
34 Hongyan Zou 2361044502@qq.com

35

36

37

38

39

40

41

42

43

44

45

46 **Abstract**

47 **Background:** The outbreak of coronavirus disease 2019 (COVID-19) has placed  
48 unprecedented challenges on hospital environmental hygiene and medical staff  
49 protection. It is crucial to assess hospital environmental hygiene to understand the  
50 most important environmental issues for controlling the spread of COVID-19 in  
51 hospitals.

52 **Objective:** To detect the presence of COVID-19 in the samples from the area at risk  
53 of contamination in the First Hospital of Jilin University.

54 **Methods:** Viruses in the air were collected by natural sedimentation and air particle  
55 sampler methods. Predetermined environmental surfaces were sampled using swabs at  
56 seven o'clock in the morning before disinfection. The real-time reverse-transcription  
57 PCR method was used to detect the existence of COVID-19 pathogens.

58 **Results:** Viruses could be detected on the surfaces of the nurse station in the isolation  
59 area with suspected patients and in the air of the isolation ward with an intensive care  
60 patient.

61 **Conclusion:** Comprehensive monitoring of hospital environmental hygiene during  
62 pandemic outbreaks is conducive to the refinement of hospital infection control. It is  
63 of great significance to ensure the safety of medical treatment and the quality of  
64 hospital infection control through the monitoring of environmental hygiene.

65 **Key words** COVID-19; hospital environmental hygiene; hospital-associated infection,  
66 medical staff protection

67

## 68 **1.Introduction**

69 The outbreak of COVID-19 in Wuhan in December 2019 has led to a serious public  
70 health event <sup>[1-3]</sup>. Meanwhile, the outbreak of this novel virus has placed  
71 unprecedented challenges on hospital environmental hygiene. The occurrence of  
72 medical staff-associated infections is closely related to long-lived pathogens in the  
73 hospital environment <sup>[4,5]</sup>. Thus, it is crucial to assess hospital environmental hygiene  
74 to understand the most important environmental issues for controlling the spread of  
75 COVID-19 in hospitals. The Chinese government quickly adopted quarantine  
76 measures for confirmed and suspected patients to restrain the spread of the  
77 pandemic<sup>[6]</sup>. Comprehensive monitoring of hospital environmental hygiene during the  
78 outbreak of the pandemic is conducive to the refinement of hospital infection control  
79 <sup>[5,7]</sup>. It also increases understanding of the environmental challenges corresponding to  
80 the reemergence of COVID-19 or similar viruses. Therefore, it is of great significance  
81 to ensure the safety of medical treatment and the quality of hospital infection control  
82 through the monitoring of environmental hygiene. According to a report from the  
83 China Centers for Disease Control and Prevention, as of February 11, 2020 medical  
84 staff members were infected with the new coronavirus (including confirmed cases,  
85 suspected cases, clinically diagnosed cases, and asymptomatic infections, of which  
86 1716 were confirmed cases), indicating that infection through no occupational  
87 exposure may occur <sup>[8]</sup>, but more evidence is needed to support this hypothesis.  
88 Meanwhile, it is extremely important to ensure the safety of medical treatments and  
89 the quality of hospital infection control by monitoring hospital environmental hygiene.

90 However, sensitive and effective methods for monitoring hospital-acquired infection  
 91 control are still limited. Here, by monitoring COVID-19 and detecting nucleic acid,  
 92 we reveal clinical data indicating hospital environmental hygiene levels and provide a  
 93 way to monitor pathogenic microorganism contamination and nosocomial infections.

94 **2.Methods**

95 **2.1 Participant Characteristics**

96 Fifteen suspected patients and one confirmed intensive care patient (ORF1ab and N  
 97 were positive according to RT-PCR) were hospitalized in two isolation areas at the  
 98 First Hospital of Jilin University, a unit for COVID-19 detection. The hospital carries  
 99 out district management for these two types of patients, and each area includes a  
 100 nursing station. We detected 158 samples of COVID-19 from the area at risk of  
 101 contamination. This study was approved by the Ethics Committee of the First  
 102 Hospital of Jilin University (Changchun, China).

103 Table 1: Collection of 158 samples from the area at risk of contamination

| Risk level     | Classification    | Sample collection points      |                                                                           |
|----------------|-------------------|-------------------------------|---------------------------------------------------------------------------|
| High-risk area | CONTAMINATED AREA | Isolation ward area 1<br>(2F) | Isolation wards 1-15 door handle                                          |
|                |                   |                               | Isolation wards 1-15 general subject surface                              |
|                |                   |                               | Isolation wards 1-15 indoor air                                           |
|                |                   |                               | Isolation wards 1-15 window frames                                        |
|                |                   |                               | Isolation wards 1-15 sides of a toilet handle                             |
|                |                   |                               | Nurse station general subject surface                                     |
|                |                   |                               | Nurse station indoor air                                                  |
|                |                   |                               | Corridor exit general subject surface                                     |
|                |                   |                               | General subject surface of the refuse storage area near the nurse station |
|                |                   | Isolation ward area 2<br>(B1) | Isolation ward 16 door handle                                             |
|                |                   |                               | Isolation ward 16 general subject surface                                 |
|                |                   |                               | Isolation ward 16 indoor air                                              |
|                |                   |                               | Isolation ward 16 window frames                                           |
|                |                   |                               |                                                                           |

|                     |                       |                                       |                                                              |
|---------------------|-----------------------|---------------------------------------|--------------------------------------------------------------|
|                     |                       |                                       | Isolation ward 16 sides of a toilet handle                   |
|                     |                       |                                       | Nurse station indoor air                                     |
|                     |                       | Fever clinic<br>2 consulting rooms    | Door handle (inside and outside)                             |
|                     |                       |                                       | General subject surface                                      |
|                     |                       |                                       | Indoor air                                                   |
|                     |                       |                                       | Computer keyboard                                            |
|                     |                       | Fever clinic<br>observation room      | Door handle (inside and outside)                             |
|                     |                       |                                       | General subject surface                                      |
|                     |                       |                                       | Indoor air                                                   |
|                     |                       |                                       | Computer keyboard                                            |
|                     |                       | Fever clinic<br>laboratory            | Door handle (inside and outside)                             |
|                     |                       |                                       | General subject surface                                      |
|                     |                       |                                       | Indoor air                                                   |
|                     |                       |                                       | Computer keyboard                                            |
|                     |                       | Fever clinic<br>blood collection room | General subject surface                                      |
|                     |                       |                                       | Indoor air                                                   |
| Medium-risk<br>area | SEMICONTAMINATED AREA | Isolation ward area<br>buffer room    | Door handle                                                  |
|                     |                       |                                       | General subject surface                                      |
|                     |                       |                                       | Indoor air                                                   |
|                     |                       |                                       | Doctor's office window frames                                |
|                     |                       |                                       | Refuse storage area wall surface                             |
|                     |                       |                                       | Disinfection bucket surface                                  |
|                     |                       |                                       | Dressing room ground                                         |
|                     |                       |                                       | Medical staff of infection department<br>protective clothing |
|                     |                       | Pre-check triages                     | General subject surface                                      |
|                     |                       |                                       | Infrared thermometer                                         |
| Low-risk area       | CLEAN AREA            | Isolation ward area<br>working area   | Entrance corridor general subject surface                    |
|                     |                       |                                       | Indoor air                                                   |
|                     |                       |                                       | Entrance corridor window frames                              |
|                     |                       |                                       | Physician's office door handle                               |
|                     |                       |                                       | Physician's office general subject surface                   |
|                     |                       |                                       | Director's office door handle                                |
|                     |                       |                                       | Door handle                                                  |

104

## 105 2.2 Sampling and Sample Processing

106 The environmental monitoring methods referenced the hospital sanitation standards

107 (GB15982-2012). All air was collected by two methods: natural sedimentation<sup>[9]</sup> and

108 a microbial air sampler (MAS-100 ECO), for which the stream of air was set to  
109 exactly 100 liters/minute (Merck, Germany) <sup>[10]</sup>. Environmental surfaces were  
110 sampled using swabs.

### 111 **2.3 Primer and Probe Sequences**

112 Two sequence regions (ORF1ab and N) that are highly conserved among sarbecoviruses were  
113 selected for primer and probe design. The primer and probe sequences for the ORF1ab gene assay  
114 were 5'-TGGGGYTTTACRGGTAACCT-3' (forward; Y = C/T, R = A/G),  
115 5'-AACRCGCTTAACAAAGCACTC-3' (reverse; R = A/G) and  
116 5'-TAGTTGTGATGCWATCATGACTAG-3' (probe, in 5'-FAM/ZEN/3'-IBFQ format; W =  
117 A/T), and the primer and probe sequences for the N gene assay were  
118 5'-TAATCAGACAAGGAACTGATTA-3' (forward), 5'-CGAAGGTGTGACTTCCATG-3'  
119 (reverse) and 5'-GCAAATTGTGCAATTTGCGG-3' (probe, in 5'-FAM/ZEN/3'-IBFQ format).  
120 The expected amplicon sizes of the ORF1ab and N gene assays were 132 bp and 110 bp,  
121 respectively<sup>[11]</sup>. All primers and probes were purchased from a commercial source (Integrated  
122 DNA Technologies). The primer and probe sequences were subsequently confirmed to have  
123 perfect matches with other COVID-19 genome sequences available from the Global Initiative on  
124 Sharing All Influenza Data (GISAID; <https://www.gisaid.org/>; accession numbers:  
125 EPI\_ISL\_402119, EPI\_ISL\_402120, EPI\_ISL\_402121, EPI\_ISL\_402123 and EPI\_ISL\_402124;  
126 accessed 12 January 2020).

### 127 **2.4 RNA Extraction**

128 All the collected samples were inactivated by heating at 56 °C for 30 minutes. For  
129 RNA extraction from 600 µL of 0.9% NaCl solution in a 2.0 mL tube, the samples

130 were centrifuged at 12000 g for 10 min and incubated for 30 min, the supernatant was  
131 discarded, 50  $\mu$ L of RNA release agent was added to the tube, and the sample was  
132 mixed and incubated for 10 min.

### 133 **2.5 Real-time Reverse-Transcription PCR**

134 A 50- $\mu$ L reaction contained 20  $\mu$ L of RNA and 30  $\mu$ L of 1 $\times$  reaction buffer consisting  
135 of 26  $\mu$ L of COVID-19 PCR mix (containing primers (4.62%), probes (1.15%),  
136 dNTPs (3.85%), MgCl<sub>2</sub> (0.77%), RNasin (0.48%), and PCR buffer (89.13%)  
137 (Shengxiang, Hunan, China)) and 4  $\mu$ L each of COVID-19 PCR enzyme mix  
138 (containing RT enzyme (62.5%) and Taq enzyme (37.5%) (Shengxiang, Hunan,  
139 China)). Thermal cycling was performed at 50 °C for 30 min for reverse transcription,  
140 followed by 95 °C for 1 min and then 45 cycles of 95 °C for 15 s and 60 °C for 30 s.  
141 Participating laboratories used a Hongshi SLAN 96 S instrument (Hongshi, Shanghai,  
142 China). A sample was considered positive when the qPCR Ct value was  $\leq$ 40.

143

### 144 **3. Results**

145 A total of 158 samples were collected from the area at risk of contamination. The two  
146 positive areas were the surfaces of the nurse station in the isolation area with  
147 suspected patients and the air of the isolation ward with an intensive care patient  
148 (Tables 2 and 3). We found that the virus was present both on surfaces and in the air.  
149 The total positive rate was 1.26% (2/158). The positive rates of the air and surface  
150 samples were 3.57% (1/28) and 0.77% (1/130), respectively.

151 Table 2: Air monitoring results for the different risk areas



| Type             |                                    | Negative | Positive | Positive rate |
|------------------|------------------------------------|----------|----------|---------------|
| High-risk area   | Isolation ward                     | 19       | 1        | 5%            |
|                  | Fever clinic consulting rooms      | 2        |          |               |
|                  | Fever clinic observation room      | 1        |          |               |
|                  | Fever clinic laboratory            | 1        |          |               |
|                  | Fever clinic blood collection room | 1        |          |               |
| Middle-risk area | Isolation ward nurse station       | 1        | 0        | 0             |
|                  | Isolation ward buffer room         | 1        | 0        | 0             |
| Low-risk area    | Isolation ward clean area          | 1        | 0        | 0             |
| Total            |                                    | 27       | 1        | 3.57%         |

152

153

154

Table 3: Surface monitoring results for the different risk areas

| Type             |                                                                   | Negative | Positive | Positive rate |
|------------------|-------------------------------------------------------------------|----------|----------|---------------|
| High-risk area   | Isolation ward door handle, general surface                       | 51       | 0        | 0%            |
|                  | Isolation ward toilet handle                                      | 6        | 0        | 0             |
|                  | Fever clinic consulting rooms                                     | 3        | 0        | 0             |
|                  | Fever clinic observation room                                     | 3        | 0        | 0             |
|                  | Fever clinic laboratory                                           | 6        | 0        | 0             |
|                  | Fever clinic blood collection room                                | 16       | 0        | 0             |
|                  | Protective clothing for medical staff in the infection department | 1        | 0        | 0             |
| Middle-risk area | Pre-check triages                                                 | 11       | 0        | 0             |
|                  | Isolation ward nurse station (keyboard)                           | 5        | 1        | 16.67%        |
|                  | Isolation ward buffer room                                        | 3        | 0        | 0             |
| Low-risk area    | Isolation ward clean area                                         | 12       | 0        | 0             |
|                  | Clean area keyboards                                              | 9        | 0        |               |
| Total            |                                                                   | 129      | 1        | 0.77%         |

155

156 Based on the original 24 hours of ultraviolet air filtering and 1000-2000 mg/L

157 chlorine-containing disinfectant for ambient air and floor disinfection, the frequencies

158 and duration times of air disinfections were extended. Key surfaces such as computer

159 keyboards that were easily overlooked were clearly noted and carefully disinfected.

160 The samples from the positive area and indoor air were collected 24 hours later, and

161 the test results were negative.

162 **4. Discussion**

163 Our positive results in nucleic acid tests indicated that viruses were present in the air  
164 of an isolation ward with intensive care patients. The hermetic spaces of isolation  
165 wards are weak in air flow, which may cause high contact with the virus. Additionally,  
166 the confirmed patient underwent tracheal intubation the day before the samples were  
167 collected, and this procedure produced large amounts of aerosols that spread in the  
168 wards and seriously polluted the air. Siegel et al. reported that medical ventilators  
169 might generate respiratory aerosols that have been associated with an increased risk of  
170 occupationally acquired infections among healthcare personnel <sup>[12]</sup>. Therefore, it is  
171 necessary to increase the intensity of disinfection for isolation wards with intensive  
172 care patients. For example, we should enhance ventilator exhaust management by  
173 adding ventilator exhaust port filters.

174 The suspected and confirmed patients stay a relatively long time in the high-risk area  
175 and may influence the environment. The intrusive and other operations that can easily  
176 produce aerosols may cause serious air pollution. The sites under observation without  
177 patients and operations have less impact on the environment. The samples from the  
178 same collection points were tested after a series of infection prevention and control  
179 measures were taken, such as continuous use of an air disinfection machine for the  
180 disinfection of ward air; extending the frequency of disinfection for ground and object  
181 surfaces; changing gloves and cleaning hands after operations and leaving the ward;  
182 and covering computer keyboards and changing the cover each day. Following the  
183 implementation of these measures, the results were negative, showing the

184 effectiveness of disinfection. In the high-risk areas, such as hospital pre-check triages  
185 and the fever clinic, due to the open environment and large amount of air flow, the  
186 results were negative.

187 The previous research reports that the routine cleaning and disinfection procedures are  
188 the most likely cause of the deficiency of disinfection in the hospital environment,  
189 leading to the spread of pathogens <sup>[13]</sup>. In our study, viruses were detected on the  
190 surfaces of the nurse station in the isolation area with suspected patients, suggesting  
191 that we need to strengthen the surface disinfection of nurse stations, especially  
192 focusing on computer keyboards, mice and types of equipment that are not easy to  
193 disinfect. A large number of studies have shown that the hands or gloves of medical  
194 staff members may be contaminated by contact with environmental surfaces  
195 contaminated by pathogens<sup>[13-15]</sup>. In the process of diagnosis and treatment, pathogens  
196 may be transmitted to patients and cause hospital-associated infections. Therefore, it  
197 is also very important to further strengthen the hand hygiene of the medical staff.

198 We need to formulate refinement measures based on environmental hygiene  
199 monitoring data to improve the quality of hospital infection control. Due to fact that  
200 “uncultivable” microbes widely exist, traditional methods used to measure the effect  
201 of hospital infection control, such as sedimentation (exposing a microbial growth  
202 plate to the environment) have shown limited effects and poor sensitivity. For  
203 laboratories and testing organizations, high concentrations of nucleic acid may exist in  
204 aerosols, which may influence the test results and the operator’s safety and may even  
205 cause spread of the disease. Nucleic acid detection provides an effective method with

206 which to monitor the environment and to evaluate the effectiveness of disinfection,  
207 especially for highly contagious diseases or pathogenic microorganisms with a  
208 potential aerosol risk, such as COVID-19. These nucleic acid detection results are  
209 very important for standardized hospital infection control. This study also increases  
210 our understanding of the environmental challenges corresponding to the reemergence  
211 of COVID-19 or similar viruses.

212 The data obtained in this study suggest that COVID-19 exists in the air of isolation  
213 wards with intensive care patients and existed on the surfaces of nurse stations and  
214 that medical staff encounter this virus in the air and on surfaces during patient care  
215 activities. An effective disinfection procedure may reduce the biosafety risk.

216 For hospital infection control, we suggest:

- 217 1. Different people should be responsible for the isolation observation area and the  
218 isolation ward area; crossing the areas should be strictly prohibited.
- 219 2. Objects in each area should be used exclusively; equipment that must be used for  
220 special purposes should be sterilized before being used in other areas.
- 221 3. Hand hygiene rules should be observed strictly, thoroughly and at all times.
- 222 4. Additional gloves, disposable isolators, protective screens or hoods should be  
223 worn when an operation may cause the spattering of blood, bodily fluid or  
224 aerosol, and these items should be discarded immediately to avoid the pollution  
225 of other areas.

226

227 **Acknowledgments**

228 This work was supported by the National Natural Science Foundation of China (Nos.  
229 30972610 and 81273240), the Jilin Province Science and Technology Agency (Nos.  
230 20160101037JC, 20170622009JC, 2017C021, and 2017J039), the Norman Bethune  
231 Program of Jilin University (2012206), and Open Project Funding From the State Key  
232 Laboratory of Kidney Diseases. We thank the patients and their families for  
233 participating in this study. We would also like to acknowledge the professional  
234 manuscript services of American Journal Experts.

235 **Disclosure Statement**

236 The authors have no conflicts of interest to declare.

237

238

239

240

241

242

243

244

245

246

247

248

249 **References**

- 250 1. Benvenuto, D., et al., The global spread of 2019-nCoV: a molecular evolutionary  
251 analysis. *Pathog Glob Health*. 2020, 12: 1-4.
- 252 2. Huang, C., et al., Clinical features of patients infected with 2019 novel  
253 coronavirus in Wuhan, China. *Lancet*. 2020, 395(10223): 497-506.
- 254 3. The, L., Emerging understandings of 2019-nCoV. *Lancet*. 2020, 395(10221): 311.
- 255 4. Anderson, D.J., et al., Enhanced terminal room disinfection and acquisition and  
256 infection caused by multidrug-resistant organisms and *Clostridium difficile* (the  
257 Benefits of Enhanced Terminal Room Disinfection study): a cluster-randomised,  
258 multicentre, crossover study. *Lancet*. 2017, 389(10071): 805-814.
- 259 5. Beggs, C., et al., Environmental contamination and hospital-acquired infection:  
260 factors that are easily overlooked. *Indoor air*. 2015, 25(5): 462-74.
- 261 6. Wang, D., et al., Clinical Characteristics of 138 Hospitalized Patients With 2019  
262 Novel Coronavirus-Infected Pneumonia in Wuhan, China. *JAMA*. 2020.
- 263 7. Phan, L.T., et al., Respiratory viruses in the patient environment. *Infect Control  
264 Hosp Epidemiol*. 2020, 41(3):259-266.
- 265 8. Chinese Center for Disease Control and Prevention, Beijing 102206, China.  
266 Epidemiology group of new coronavirus pneumonia emergency response  
267 mechanism, Chinese center for disease control and prevention, The  
268 epidemiological characteristics of an outbreak of 2019 novel coronavirus  
269 diseases (COVID-19) in China, *Zhonghua Liu Xing Bing Xue Za Zhi*. 2020,  
270 41(2):145-151.

- 271 9. Odebode A, et al., Airborne fungi spores distribution in various locations in Lagos,  
272 Nigeria. Environ Monit Assess. 2020, 192(2):87.
- 273 10. Irie K, et al., Investigation of the detection ability of an intrinsic  
274 fluorescence-based bioaerosol detection system for heat-stressed bacteria. PDA  
275 J Pharm Sci Technol. 2014, 68(5):478-93
- 276 11. Chu DKW, et al., Molecular Diagnosis of a Novel Coronavirus (2019-nCoV)  
277 Causing an Outbreak of Pneumonia. Clin Chem. 2020, pii: hvaa029. doi:  
278 10.1093/clinchem/hvaa029.
- 279 12. Siegel, J.D., et al., 2007 Guideline for Isolation Precautions: Preventing  
280 Transmission of Infectious Agents in Health Care Settings. Am J Infect Control.  
281 2007, 35(10 Suppl 2): S65-164.
- 282 13. Pirincci, E. and B. Altun, An analysis of hospital cleaning staff's attitudes and  
283 conduct regarding hand hygiene and cleaning. Int J Occup Saf Ergon. 2016, 22(2):  
284 241-5.
- 285 14. Pittet, D., et al., Evidence-based model for hand transmission during patient care  
286 and the role of improved practices. Lancet Infect Dis. 2006, 6(10): 641-52.
- 287 15. Christensen, T.E., J.S. Jorgensen, and H.J. Kolmos, [The importance of hygiene for  
288 hospital infections]. Ugeskr Laeger. 2007, 169(49): 4249-51
